# Supplementary material for: Plasmonic-Assisted Water–Gas Shift Reaction of Gold Particles on TiO2
Source: MDPI journal article supplement (doi:10.3390/catal13111444), 2023-11-15
Supplement: s1 [file s1]

# Plasmonic-Assisted Water–Gas Shift Reaction of Gold Particles on TiO<sub>2</sub>

Ahmed Khaja Wahab <sup>1</sup>, Kumudu Mudiyansele <sup>2,†</sup> and Hicham Idriss <sup>3,\*</sup>

<sup>1</sup> Department of Chemical Engineering, University of Waterloo, Waterloo, ON N2L 3G1, Canada

<sup>2</sup> Surface Science and Advanced Characterization, SABIC-CRD at King Abdullah University for Science and Technology (KAUST), Thuwal 23955, Saudi Arabia

<sup>3</sup> Institute of Functional Interfaces, Karlsruhe Institute of Technology (KIT), 76344 Eggenstein-Leopoldshafen, Germany

\* Correspondence: hicham.idriss@kit.edu

<sup>†</sup> Current address: Albemarle Corporation, Corporate Headquarters, 4250 Congress Street, Suite 900, Charlotte, NC 28209, USA.

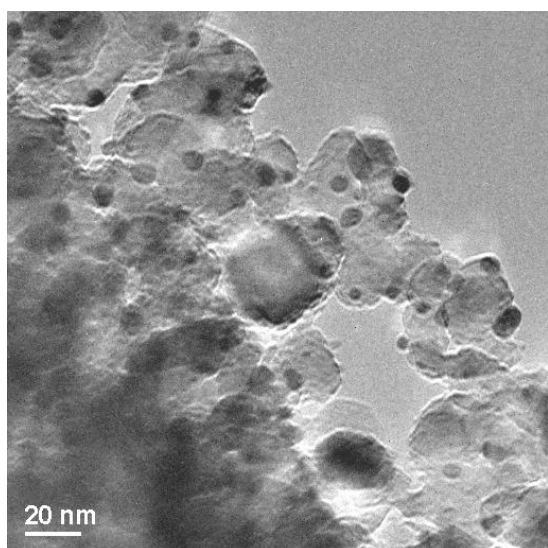

A

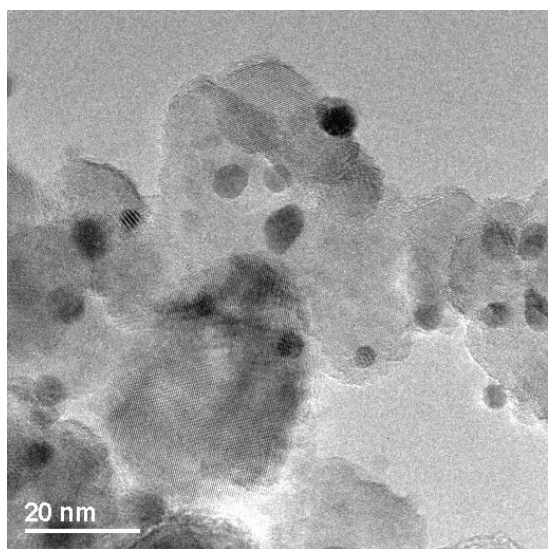

B

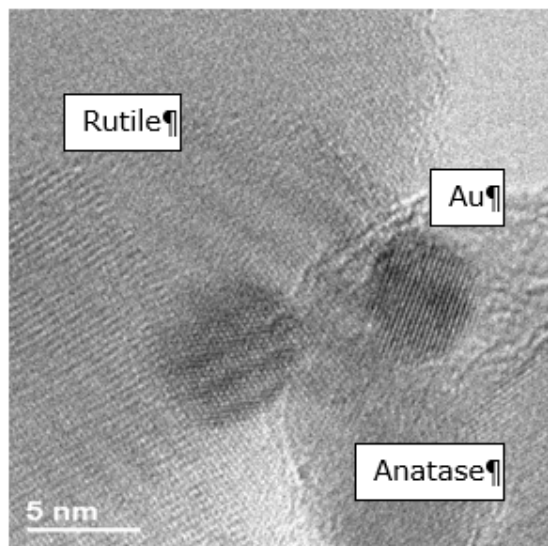

C

**Figure S1.** Transmission Electron Microscopy images of 8 wt.% Au/TiO<sub>2</sub> P25 with different magnifications.

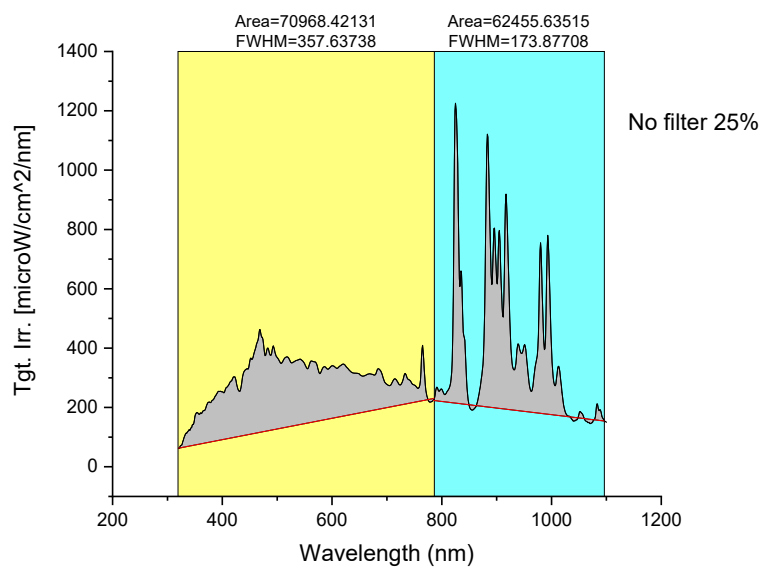

**Figure S2.** Light flux as a function of wavelengths from 320 to 1100 nm (25% light intensity)

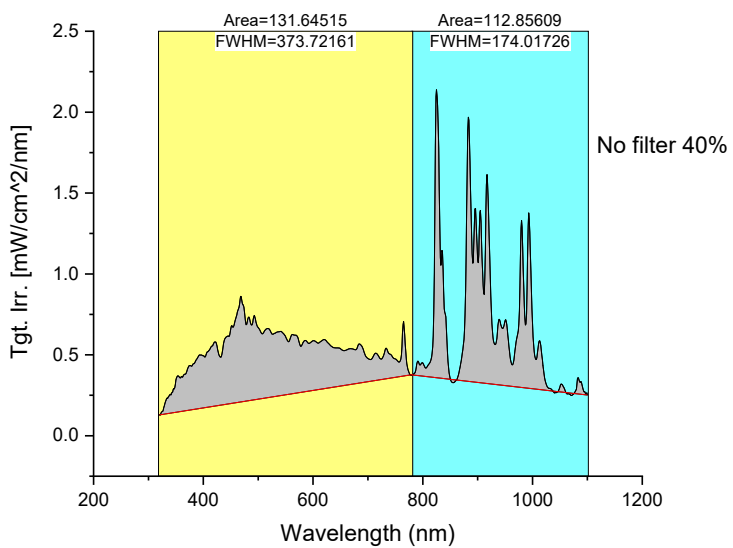

**Figure S3.** Light flux as a function of wavelengths from 320 to 1100 nm (40% light intensity)

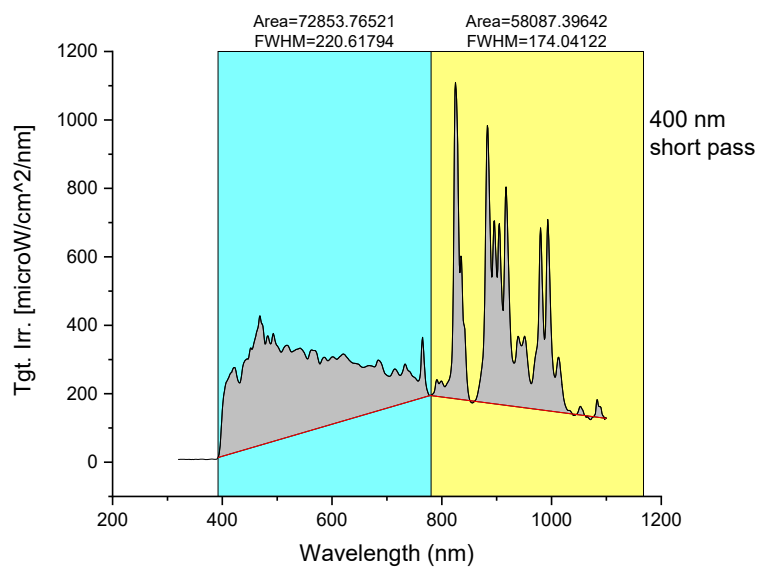

**Figure S4.** Light flux as a function of wavelengths from 400 to 1100 nm (25% light intensity)

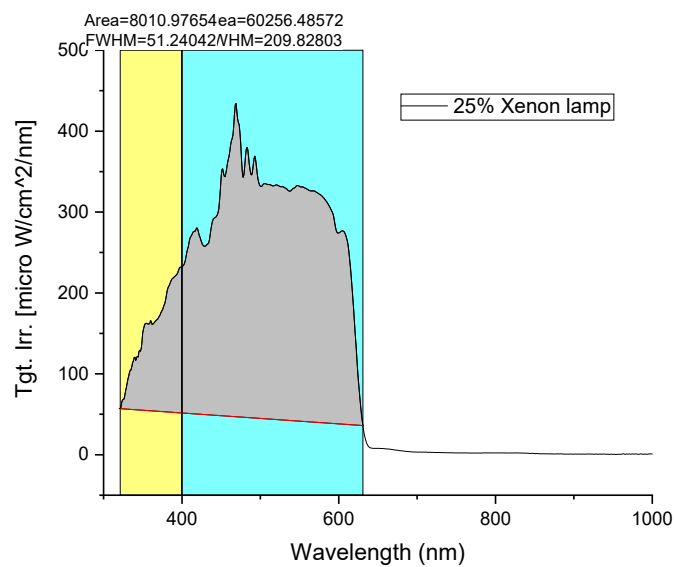

**Figure S5.** Light flux as a function of wavelengths from 320 to 620 nm (25% light intensity)

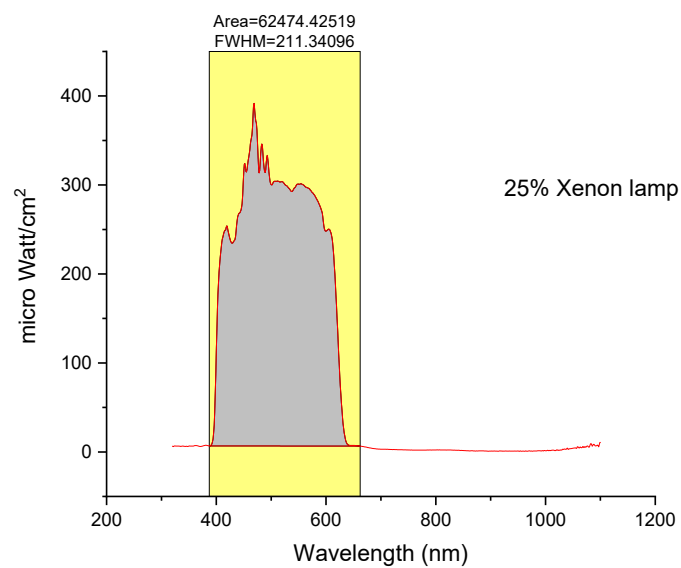

**Figure S6.** Light flux as a function of wavelengths from 400 to 660 nm (25% light intensity)

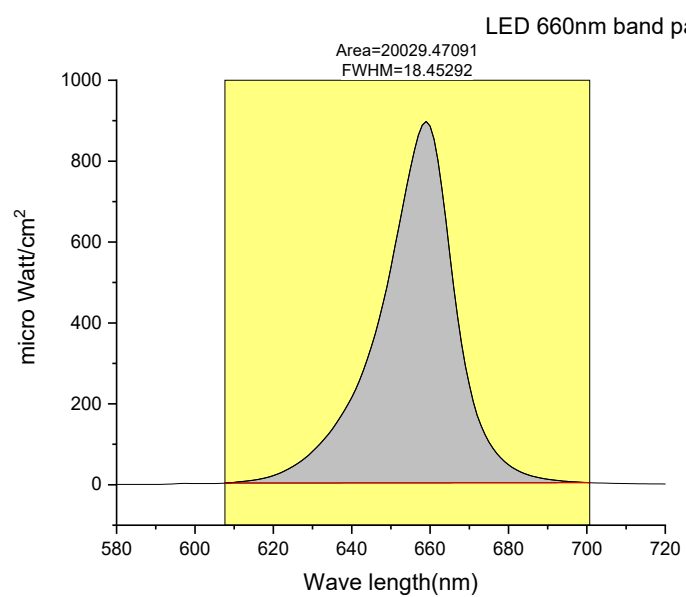

**Figure S7.** Light flux as a function of wavelengths from 610 to 700 nm (LED with band pass filter at 80% intensity)

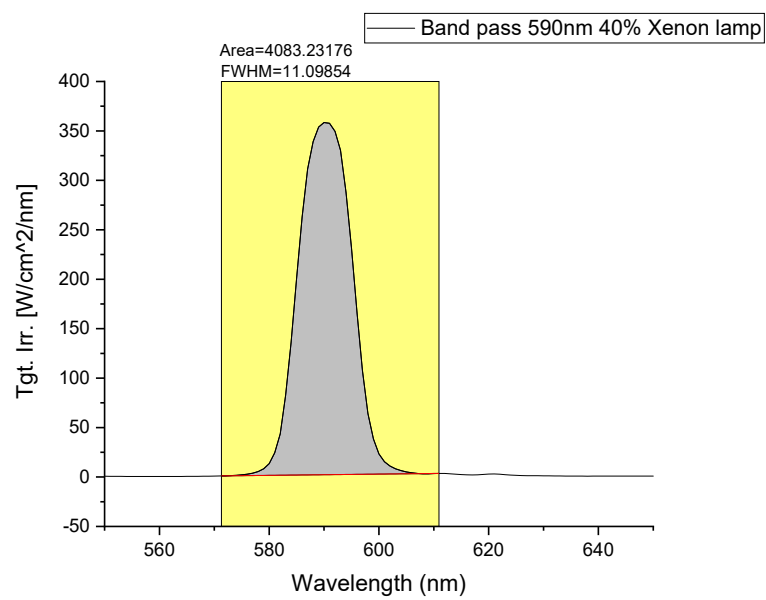

**Figure S8.** Light flux as a function of wavelengths from 570 to 610 nm (band pass filter 40% light intensity)
